# Supplementary material for: Autophagy Upregulation in Mutant Isocitrate Dehydrogenase 1 (IDH1) Glioma Uncovers a Novel Therapeutic Target
Source: Research Square preprint supplement (doi:10.21203/rs.3.rs-7483444/v1), 2025-09-11
Supplement: Supplementary file 1 [file 435e433d5fcb38e987ad8450.xlsx]

## Sheet: Fig. 1C
Table S2 for Figure. 1C Raw counts of TCA cycle related genes.
	wtIDH1			mIDH1
Gene	NPA-C2	NPA-C54A	NPA-C54B	NPAI-C1	NPAI-C2	NPAI-C3	log2FoldChange	-log10(q value)
Atp6v0d2	56	12	1	1	0	0	-4.23411	0.5115
Cox7a1	12	134	35	6	30	3	-1.53494	0.4838
Cox4i2	10	14	34	1	4	9	-1.42139	0.6489
Atp6v1g1	47858	17877	11736	6030	11882	7623	-1.10985	0.572
Uqcrq	15663	11208	7825	4018	5766	4314	-0.900591	0.8691
Ndufs8	9807	5575	6274	2920	3346	3060	-0.842476	0.8691
Ndufs3	8039	6266	5906	4126	6602	4352	-0.292858	0.6089
Ndufs5	1103.02	1752	1747.96	1144.98	1171.91	1401	-0.213548	0.4992
Ndufs4	8049	3287	2517	1966	2649	2240	-0.703524	0.5115
Cox16	1741	847	920	632	590	611	-0.649092	0.6489
Cox7c	12808	7747	7103	4238	5526	4824	-0.639716	0.7323
Atp5j	13156	11641	11942	6013	5901	7803	-0.622358	1.282
Ndufb4	4633	3895	3517	1845	2358	2287	-0.618387	1.006
Ndufv3	2376	3190	2749	1329	2022	1202	-0.602275	0.9203
Ndufa12	8484	6676	5083	3225	3785	4146	-0.595832	0.8691
Ndufa11	4050	3725	2757	1681	2245	1941	-0.585075	0.9203
Tcirg1	6459	7358	6929	2678	6477	2746	-0.555731	0.7305
Ndufb11	7807	5122	4453	3061	3752	3401	-0.531676	0.7305
Cox5b	18725	13517	9870	6618	11415	7042	-0.518461	0.6489
Ndufb5	6726	5963	4640	2965	3928	3530	-0.508366	0.9203
Ndufs7	5459.07	5347.02	4841.02	2303.02	4383.07	3147	-0.464533	0.8691
Ndufc1	3200	3431	2631	2038	1870	1913	-0.464448	1.006
Ndufv2	9981	9559	6394	4974	6148	5283	-0.457969	0.7789
Atp5o	21379	13154	10533	8755	8908	11307	-0.441867	0.5921
Cox17	3703	3614	3338	1295	3688	2157	-0.400316	0.6089
Coq10b	3058	2046	2073	1278	1263	2289	-0.396035	0.6089
Ndufa6	4507	7367	3671	2363	5440	2509	-0.410431	0.4558
Cox18	1266	748	701	457	665	730	-0.382526	0.5452
Ndufa7	5212	4360	3047	2226	3242	3101	-0.387053	0.6489
Cox19	1481	1239	906	659	856	963	-0.380678	0.6489
Ndufab1	7934	6339	5441	3839	3914	5790	-0.375459	0.6669
Ndufc2	5315	5310	5028	2604	4867	3395	-0.365024	0.7323
Ndufa13	6282	7097	6927	3794	6641	4522	-0.305737	0.6489
Ndufb2	1520	2341	1648	1327	1375	1317	-0.31535	0.6489
Cox6a1	12788	11573	8022	6673	8721	8427	-0.307066	0.63
Ndufs3	8039	6266	5906	4126	6602	4352	-0.292858	0.6089
Ndufb6	5221	2892	2547	2484	2444	3032	-0.292069	0.414
Ndufb8	6401	5990	5168	3934	5248	4141	-0.276075	0.7779
Ndufa2	6140	6521	5133	4197	4660	4629	-0.277209	0.8944
Atp5l	6596	10233	8452	5888	6667	7667	-0.223282	0.5452
Ndufs5	1103.02	1752	1747.96	1144.98	1171.91	1401	-0.213548	0.4992
Ndufs6	2135	2229	2016	1523	1784	1850	-0.212813	0.9203
Ndufb9	6351	7807	4323	3360	6620	4871	-0.218676	0.3462
Ndufb10	4247	4086	2941	2882	3294	2891	-0.217858	0.6089
Cox7b	9853	9691	8391	6683	9257	7001	-0.196955	0.623
Atp5d	11824.1	9239.02	7097.02	6573.02	8515.07	7986	-0.199197	0.4546
Ndufb7	2546	4351	3342	2471	3387	2534	-0.198925	0.4125
Cox7a2	7156	6297	4501	4680	5433	5906	-0.114037	0.2935
Uqcrc2	11153	9937	6956	7114	8741	9673	-0.0940701	0.2214
Sucla2	2368	2898	2282	3616	4635	4109	0.493183	1.006
Suclg1	2535	3005	1929	3797	4526	4416	0.533907	1.006
Ndufs1	3645.99	4025	3516	5314	7482	7238	0.582679	1.006
Ndufs2	5228	5809	4829	6864	12424	9478	0.595016	0.7789
Suclg2	3376	3755	3612	6572	6096	7129	0.611276	1.401
L2hgdh	912	730	798	1499	1435	2026	0.709408	1.006
Idh1	2315	5927	2851	12886	18845	9514	1.31322	0.9203
Me2	1376	2496	903	10927	3251	7518	1.51373	0.7505
