# Supplementary material for: Autophagy Upregulation in Mutant Isocitrate Dehydrogenase 1 (IDH1) Glioma Uncovers a Novel Therapeutic Target
Source: Research Square preprint supplement (doi:10.21203/rs.3.rs-7483444/v1), 2025-09-11
Supplement: Supplementary file 2 [file 96736bb7a38fe4ce706f2bec.xlsx]

## Sheet: Fig. 1B
Table S1 for Figure. 1B Raw counts of autophagy related genes.
	wtIDH1			mIDH1
Gene	NPA-C2	NPA-C54A	NPA-C54B	NPAI-C1	NPAI-C2	NPAI-C3	log2FoldChange	-log10(q value)
Pik3c2b	71	98	101	514	589	467	1.76041	2.171
Huwe1	7261	7534	6087	22347	17493	21326	1.0747	2.121
Pik3cb	474	1157	549	3181	2401	3510	1.42807	1.912
Vps13c	475	374	329	1174	1190	1157	1.09493	2.562
Cdkn2a	7434	905	290	23004	19328	27358	2.08893	1.964
Snx14	756	989	651	1742	2501	2121	0.976856	1.912
Foxo3	40	184	195	600	515	1052	1.64323	1.558
Vps13a	1405	1142	1115	3329	2696	4602	1.06539	1.685
Svip	3	33	17	294	6	157	2.15439	0.8053
Rab3gap1	1372	1577	1126	2926	3128	2860	0.782752	2.156
Htt	2410	2338	2128	4058	4943	5290	0.731593	1.977
Eif2ak4	1172	1094	930	2010	2220	2371	0.725321	2.121
Mapk14	930	1471	1106	4027	2103	3479	1.00794	1.579
Pim2	515	421	226	1189	1028	919	0.992805	1.912
Ubxn2a	586	494	264	1158	1341	1025	0.963946	1.912
Bcl2	760	1021	517	1561	1789	1932	0.832266	1.912
Depdc5	745	1128	970	1967	1953	2681	0.842361	1.815
Atm	909	1634	1599	3658	2660	4250	0.936652	1.685
Rb1cc1	1464	1559	944	2278	4513	2758	0.878426	1.297
Fnbp1l	2731	2517	1401	6969	3735	5854	0.912403	1.504
Vps4b	2540	2401	1791	3763	5061	4737	0.700326	1.856
Rock1	1767	2336	1651	3533	3526	4521	0.699384	1.85
Acbd5	740	1277	659	1746	2350	1847	0.797891	1.682
Wdr6	1581	3726	2469	7826	5400	5778	0.893607	1.652
Trappc8	1789	2130	1444	2859	3572	3968	0.662186	1.727
Usp10	5757	4075	4077	9045	9032	11547	0.756049	1.891
Tbc1d14	701	1434	1248	2387	2014	3655	0.867654	1.391
Ptk2	4234	4999	2526	6602	9578	8005	0.721114	1.636
Rab7	2460	3007	1700	3953	4523	5404	0.660962	1.671
Foxk1	1285	1139	1549	2606	2356	3671	0.776071	1.636
Uvrag	1657	1389	1235	2484	2539	2969	0.624254	1.964
Atg2a	981	1096	1113	2339	1986	1944	0.675596	2.077
Vps33a	1452	902	630	2249	1817	2396	0.772674	1.664
Pik3r4	599	1056	894	1958	1443	1917	0.735396	1.724
Bcl2l11	1191	852	1314	2755	2323	2078	0.756903	1.891
Gnai3	4431	6284	4585	9682	7953	11070	0.629218	1.685
Vps13d	1023	948	676	1802	1363	1957	0.660118	1.675
Smcr8	2562	2888	1903	4017	4635	4216	0.559635	1.901
Atg2b	2352	2111	2122	3907	3382	5247	0.64381	1.594
Herc1	1838	1455	1138	3118	2195	3324	0.66743	1.586
Tsc1	1646	1508	1135	2574	2471	2578	0.575116	1.978
Atg14	521	490	426	768	916	812	0.552132	1.977
Vcp	21948	18821	17475	35666	28795	37892	0.563787	1.831
Ager	66	51	57	22	42	39	-0.524326	1.483
Fbxl2	417	299	319	245	223	220	-0.408368	1.483
Lepr	132	125	154	56	69	96	-0.620431	1.724
Stub1	6920	7112	7050	4884	4232	5547	-0.363092	1.912
Qsox1	4443	5315	3925	2823	1689	3077	-0.589454	1.58
Trim8	8455	7038	7744	4809	4938	5147	-0.444787	1.977
Trim21	420	425	492	122	197	180	-0.985577	2.121
Dcn	2171	2115	879	287	10	39	-2.73255	1.636
Casp1	2764	2168	2782	177	703	164	-1.99998	2.121
S100a8	237	491	627	32	25	20	-2.86775	1.636
